# Supplementary material
Source: HighWire-hosted journal article supplement (https://rapm.bmj.com/highwire/filestream/15512/field_highwire_adjunct_files/2/rapm-2021-102705supp003_data_supplement.pdf)
Supplement: rapm-2021-102705supp003_data_supplement.pdf [file rapm-2021-102705supp003_data_supplement.pdf]

## Appendix C – Risk of Bias Summary

|                   | Random sequence generation (selection bias) | Allocation concealment (selection bias) | Blinding of participants and personnel (performance bias) | Blinding of outcome assessment (detection bias) | Incomplete outcome data (attrition bias) | Selective reporting (reporting bias) |
|-------------------|---------------------------------------------|-----------------------------------------|-----------------------------------------------------------|-------------------------------------------------|------------------------------------------|--------------------------------------|
| Amin 2021         | +                                           | +                                       | ?                                                         | ?                                               | ?                                        | +                                    |
| Chia 2020         | +                                           | ?                                       | ?                                                         | ?                                               | ?                                        | +                                    |
| Li 2020           | +                                           | +                                       | +                                                         | +                                               | +                                        | +                                    |
| Ling 2020         | +                                           | ?                                       | ?                                                         | ?                                               | ?                                        | ?                                    |
| Ochroch 2019      | +                                           | +                                       | +                                                         | +                                               | +                                        | +                                    |
| Okunlola 2020     | +                                           | +                                       | +                                                         | +                                               | +                                        | +                                    |
| Patterson 2020    | +                                           | ?                                       | +                                                         | +                                               | +                                        | +                                    |
| Singtana 2020     | +                                           | +                                       | +                                                         | +                                               | ?                                        | ?                                    |
| Tak 2020          | +                                           | +                                       | +                                                         | +                                               | +                                        | +                                    |
| Vichainarong 2020 | +                                           | +                                       | +                                                         | +                                               | +                                        | +                                    |
| Vijay 2020        | +                                           | +                                       | +                                                         | +                                               | ?                                        | ?                                    |
| Wang 2020         | +                                           | +                                       | ?                                                         | +                                               | ?                                        | ?                                    |
| Zadoroznijs 2020  | ?                                           | ?                                       | ?                                                         | ?                                               | ?                                        | ?                                    |
| Zhou 2020         | +                                           | ?                                       | ?                                                         | ?                                               | ?                                        | ?                                    |
